# Supplementary material for: On the Complexity of Resting State Spiking Activity in Monkey Motor Cortex
Source: PubMed Central journal article supplement (PMC8271144; doi:10.1093/texcom/tgab033), 2021-05-18
Supplement: resting_state_dynamics_s4_reviewed_accepted_tgab033.pdf [file resting_state_dynamics_s4_reviewed_accepted_tgab033.pdf]

## Supplement 4: External resources

The preprocessed data and Python scripts reproducing figures from this publication can be found in a public repository at:  
<https://doi.org/10.5281/zenodo.4696024>.
